# Supplementary material for: Addition of flavonols and polysaccharides as excipient ingredients into epicatechin rich green tea extract inhibited free radical formation and glucose uptake
Source: Royal Society of Chemistry journal article supplement (doi:10.1039/c9fo03020d), 2020-01-01
Supplement: c9fo03020d1.pdf [file c9fo03020d1.pdf]

## Addition of flavonols and polysaccharides as excipient ingredients into epicatechins rich green tea extract inhibited free radical formation and glucose uptake

So-Hee Yoo<sup>1</sup>, Yeong-Eun Lee<sup>1</sup>, Jin-Oh Chung<sup>1,2</sup>, Chan-Su Rha<sup>2</sup>, Yong-Deog Hong<sup>2</sup>, Mi-Young Park<sup>2</sup>, Soon-Mi Shim<sup>1\*</sup>

<Supplementary data>

Table 1. Contents of three kinds of flavonols flavonol extracts derived from green tea (FVN) and onion/whangchil mixture (OW) (mg/g).

|     | Myricetin   | Quercetin    | Kaempferol  | Total flavonol |
|-----|-------------|--------------|-------------|----------------|
| FVN | 4.91 ± 0.27 | 9.27 ± 0.57  | 3.76 ± 0.22 | 17.94 ± 1.05   |
| OW  | 0.00 ± 0.00 | 78.49 ± 2.45 | 0.00 ± 0.00 | 78.49 ± 2.45   |

a. Flavonols derived from green tea (FVN, AMOREPACIFIC Corp.) were obtained as previous research (<https://doi.org/10.3390/antiox8080278>). Briefly, green tea extract solution (1 %, w/v) was reacted with 1 % (v/v) cellulase (100,000 units/mL) in a thermos shaker (Eppendorf AG, Hamburg, Germany) for 14 h at 40 °C and with 1% (v/v) cellulase (100,000 units/mL) in a t 90 r (Eppendorf AG, Hamburg) pulverized by using freeze dryer.

b. Onion and whangchil mixture (OW) was a mixture of onion peel extract powder (OP) and

whangchil in a 4: 1 ratio(w : w). Onion peel extract powder (OP) was manufactured by Nutraceuticals International Group LLC (Bloomingdale, NJ,USA) and purified using a column. Powdered extract of whangchil, commonly known as Korean Dendropanax, was supplied by BK Bio Company (Jeju, SouthKorea) after two extractions with ethanol and purified water.
